# Supplementary material
Source: Springer Nature journal article supplement (https://www.springermedizin.de/resource/supplementary/13024_2013_391_MOESM3_ESM.pdf/9644028)
Supplement: MOESM3 [file 9644028]

M13 Reverse priming site

SP6 promoter/priming site ↓

201 CACACAGGAA ACAGCTATGA CATGATTAC GCCAAGCTAT TTAGGTGACA CTATAGAATA  
GTGTGTCCTT TGTCGATACT GGTACTAATG CGGTTTCGATA AATCCACTGT GATATCTTAT

*Nsi* | *Hind* III | *Asp*718 | *Kpn* I | *Eco*136 II | *Sac* I | *Bam*HI | *Spe* I

CTCAAGCTAT GCATCAAGCT TGGTACCGAG CTCGGATCCA CTAGTAACGG CCGCCAGTGT  
GAGTTCGATA CGTAGTTCGA ACCATGGCTC GAGCCTAGGT GATCATTGCC GCGGGTCACA

*Eco*RI

*Eco*RI ↓

*Eco*RI

*Pst*I | *Eco*RV

GCTGGAATTC GCCCTT  
CGACCTTAAG CGGGAA

**C9ORF72 Fragment** →

AAGGGCGAATTCT GCAGATA  
TTCCCGCTTAAGA CGTCTAT

*Not*I

*Xho*I

*Nsi*I | *Xba*I

*Dra*II

*Apa*I

T7 promoter/priming site

TCCATCACAC TGGCGGCCGC TCGAGCATGC ATCTAGAGGG CCCAATTCGC CCTATAGTGA  
AGGTAGTG TG ACCGCCGGCG AGCTCGTACG TAGATCTCCC GGGTTAAGG GGATATCACT

M13 Forward (-20) priming site

GTCGTATTAC AATTCACTGG CCGTCGTTTT ACAACGTCGT GACTGGGAAA ACCCTGGCGT 476  
CAGCATAATG TTAAGTGACC GGCAGCAAAA TGTTGCAGCA CTGACCCTTT TGGGACCGCA
